# Supplementary material for: Highly tunable emission properties of solid-state supramolecular compounds based on Eu mixed-lanthanide complexes and cucurbit[6]uril
Source: Royal Society of Chemistry journal article supplement (doi:10.1039/d4ce00375f), 2024-01-01
Supplement: d4ce00375f1.pdf [file d4ce00375f1.pdf]

Supporting Information

## Highly tunable emission properties of solid state supramolecular compounds based on Eu-mixed lanthanide complexes and cucurbit[6]uril

Mariana I. Rakhmanova,<sup>a</sup> Taisiya S. Sukhikh<sup>a</sup>, Ekaterina A. Kovalenko<sup>a\*</sup>

<sup>a</sup>*Nikolaev Institute of Inorganic Chemistry, Siberian Branch of the Russian Academy of Sciences, 3, Academician Lavrentiev Avenue, Novosibirsk 630090, Russian Federation*

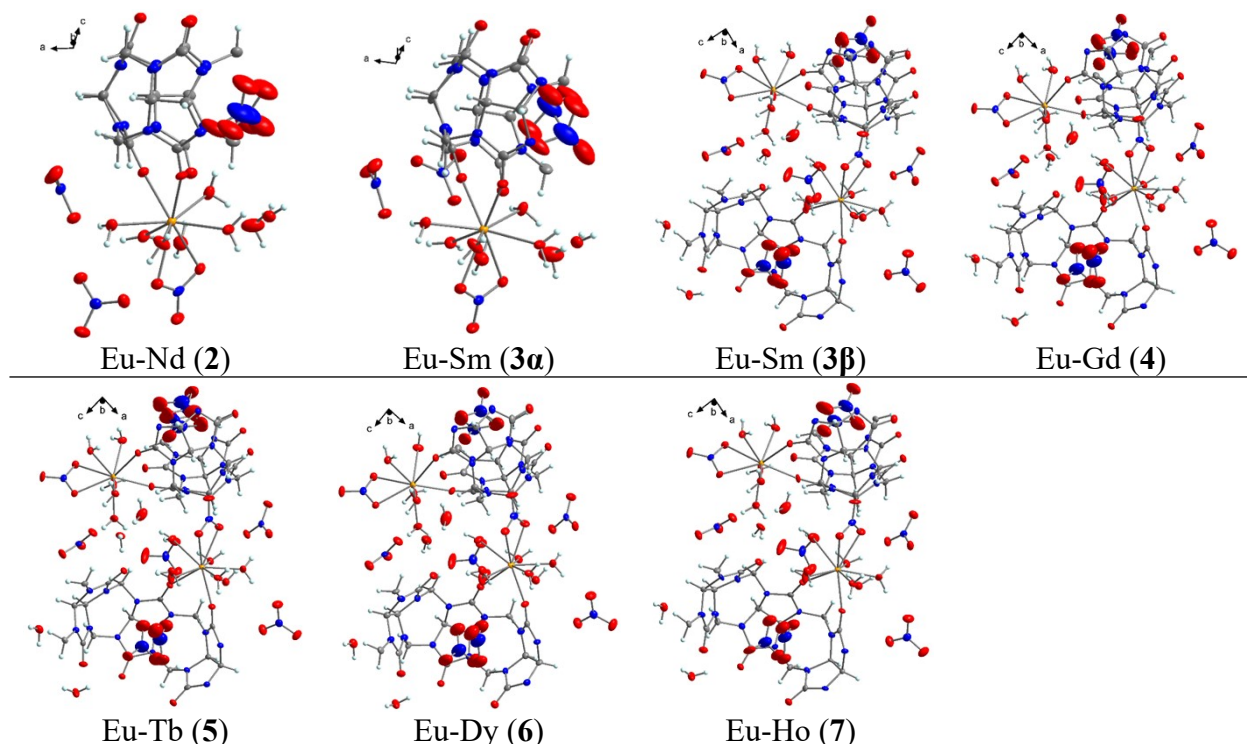

Figure S1. Representation of atomic displacement ellipsoids (50% probability) for non-hydrogen atoms in the crystallographically independent part of the structures. Hydrogen atoms are shown as spheres of fixed size. Each of the disordered nitrates located in the cavity of CB[6] is further disordered over two positions due to the proximity to the special position.

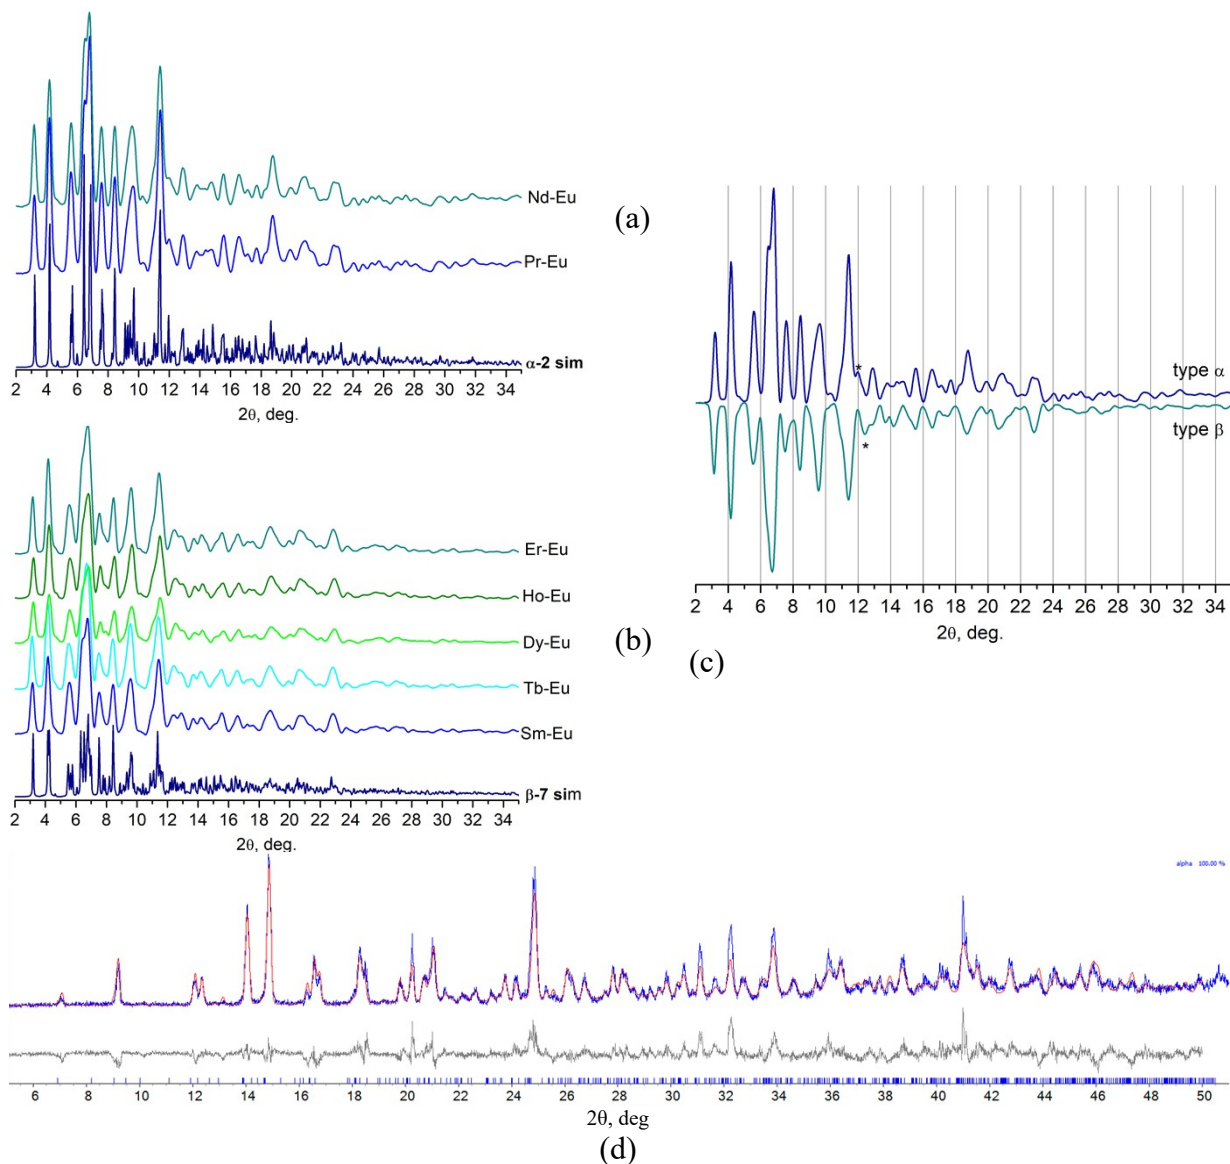

Fig. S2. Simulated and experimental (Mo  $K\alpha$  radiation, 150 K) powder XRD patterns for type  $\alpha$  (a) compounds **1**, **2** and  $\beta$  (b) compounds **3–8**, and their comparison (c) showing slight differences. (d) Rietveld refinement for a sample [Eu-Pr]: the experimental pattern (Cu  $K\alpha$  radiation, 298 K; blue), simulated pattern (red) and the difference (gray). Refined unit cell parameters:  $P2_1/n$ ,  $a = 14.5417(4)$  Å,  $b = 13.6308(7)$  Å,  $c = 18.3293(7)$  Å,  $\beta = 105.476(3)^\circ$ ,  $V = 3501.4(2)$  Å<sup>3</sup>. Atomic positions were fixed to be the same as in the single-crystal structure. Some differences of the peak intensities can be due to a slight variation of atomic positions; applying spherical harmonic (order 4) preferred orientation functions does not completely eliminate the difference.

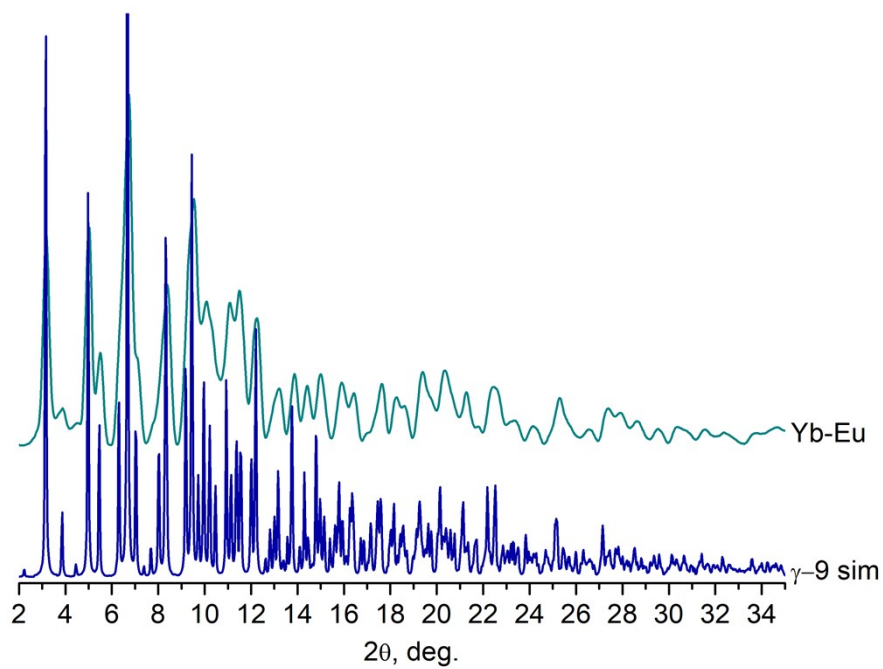

Fig. S3. Simulated and experimental (Mo K $\alpha$  radiation) powder XRD patterns for type  $\gamma$  compound

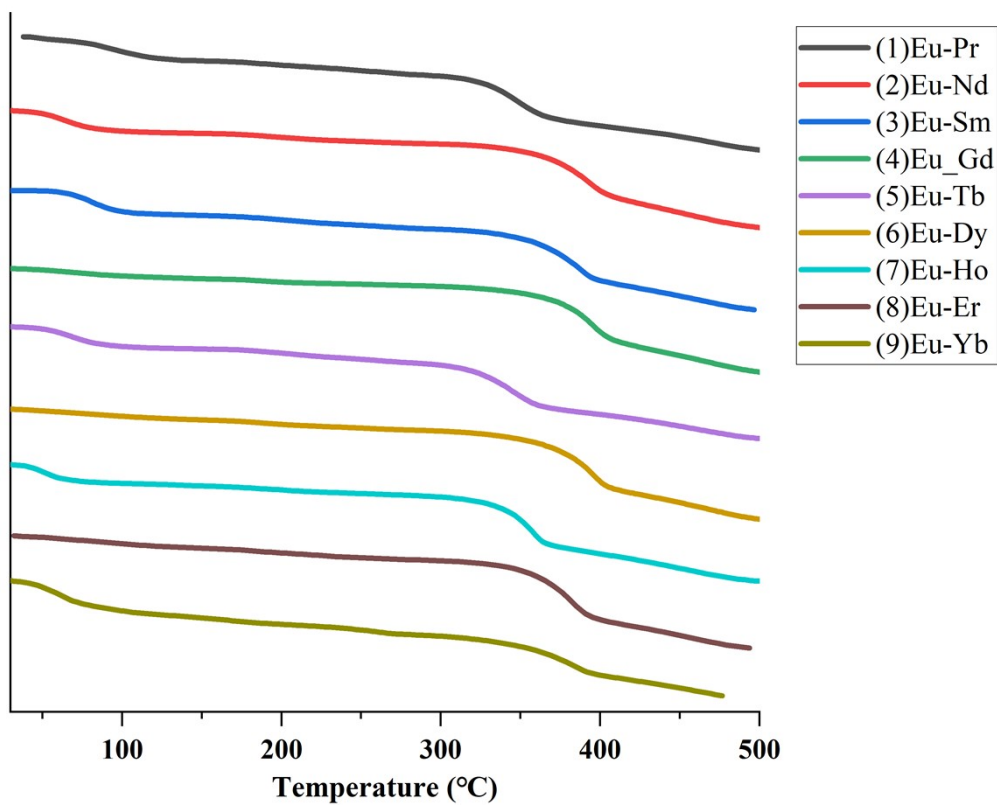

Fig. S4a. The TGA curves of compounds 1–9.

Fig. S4b. The TGA curve of compound Eu-Pr (1)

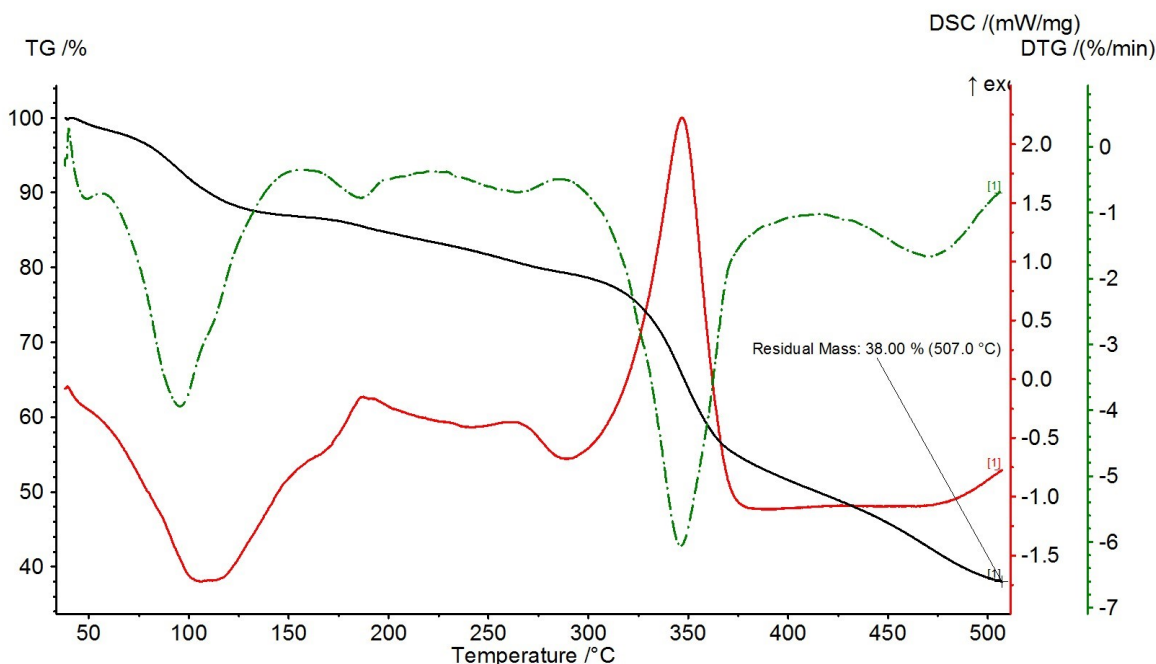

Thermal decomposition of compound **1**. First, dehydration occurs in the temperature range of 55–150°C and is accompanied by a 10 % weight loss of eight crystallization water molecules. In the temperature range of 160–300°C, the sample gradually is decomposed, being accompanied by loss of crystallization nitric acid molecules. Further weight loss occurs at 350°C, which corresponds to the decomposition temperature of CB[6].

Fig. S4c. The TGA curve of compound Eu-Nd (2)

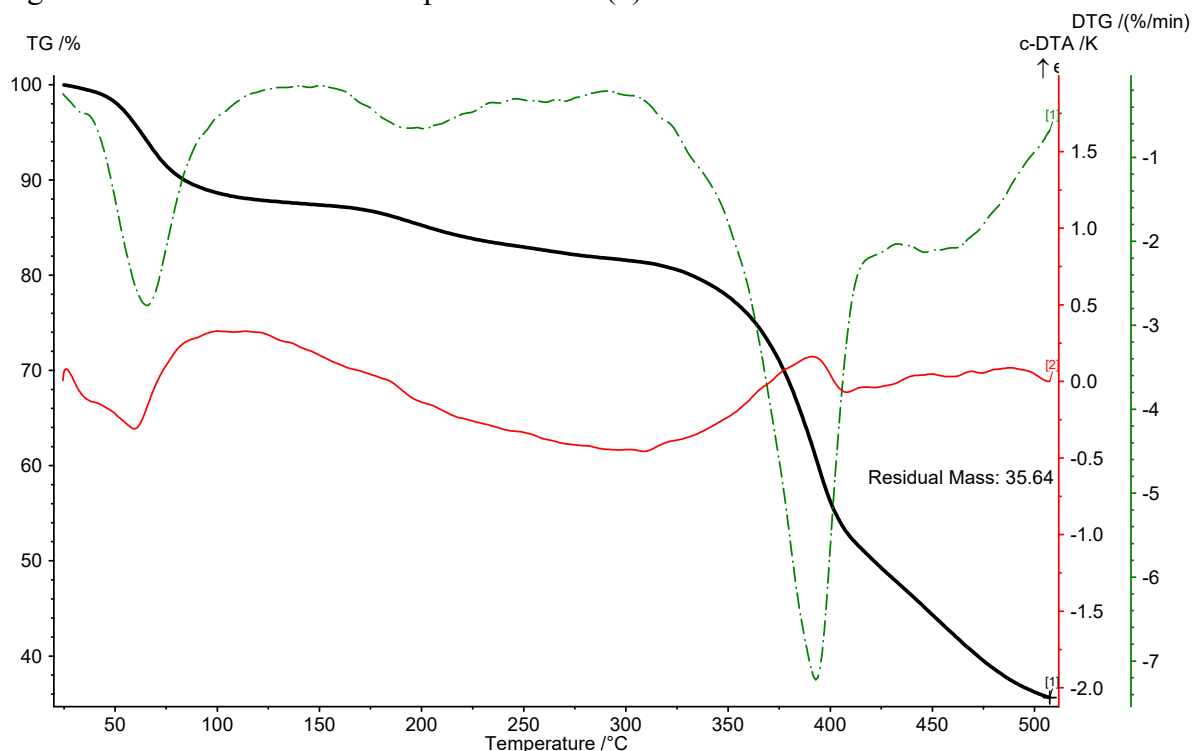

Thermal decomposition of **2** begins at 55–60°C. Desolvation occurs in the temperature range of 60–100°C, being accompanied by a 9 % weight loss of the eight crystallization water. At temperature 150°C compound loose one crystallization nitric acid molecule. In the temperature ranges of 200–350°, the sample is gradually decomposed. Further weight loss occurs at 390°C, which corresponds to the decomposition temperature of CB[6].

Fig. S4d. The TGA curve of compound Eu-Sm (3)

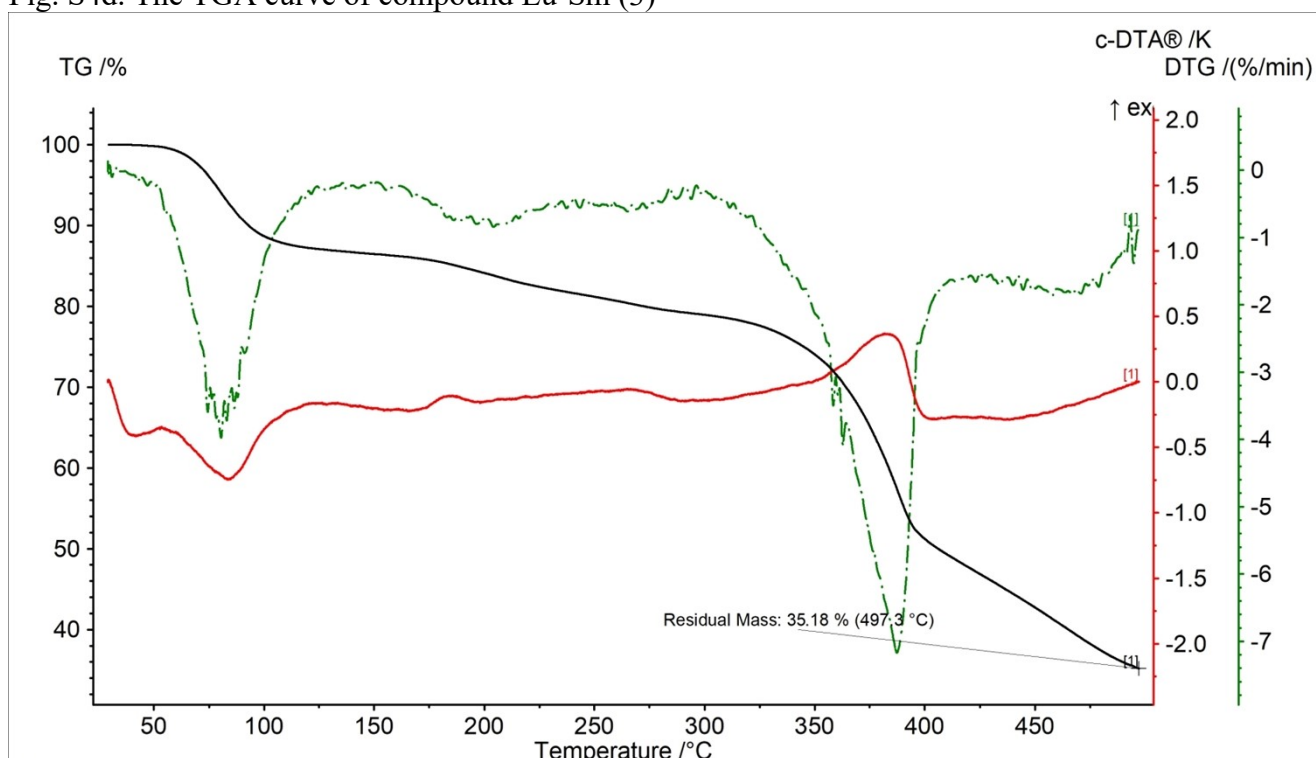

Thermal decomposition of compound **3**. Desolvation occurs in the temperature range of 55–100°C, being accompanied by a 12 % weight loss of the ten crystallization water. At temperature 150°C compound loose one crystallization nitric acid molecule. In the temperature ranges of 200–350°, the sample is gradually decomposed. Further weight loss occurs at 390°C, which corresponds to the decomposition temperature of CB[6].

Fig. S4e. The TGA curve of compound Eu-Gd (4)

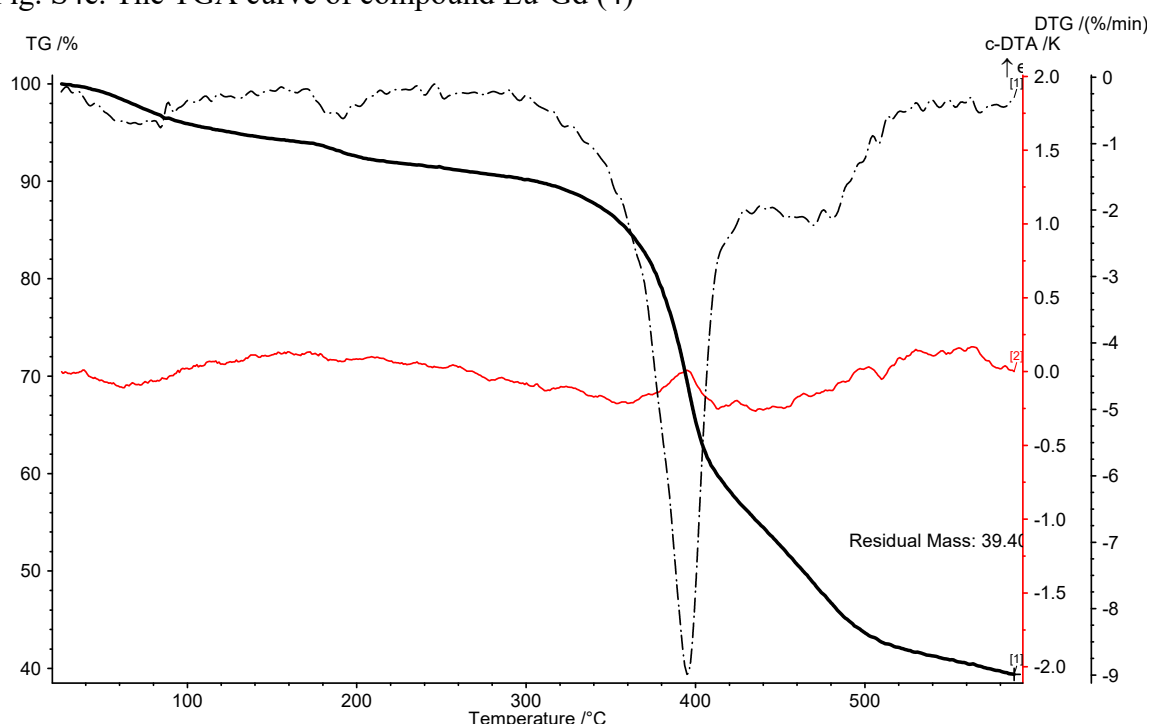

On the mass loss curve of compound **4** we observe the gradual thermal decomposition of the sample in the temperature range of 50–300°C and is accompanied by a 8 % weight loss of six crystallization water molecules and crystallization nitric acid molecules. Further weight loss occurs at 395°C, which corresponds to the decomposition temperature of CB[6].

Fig. S4f. The TGA curve of compound Eu-Tb (5)

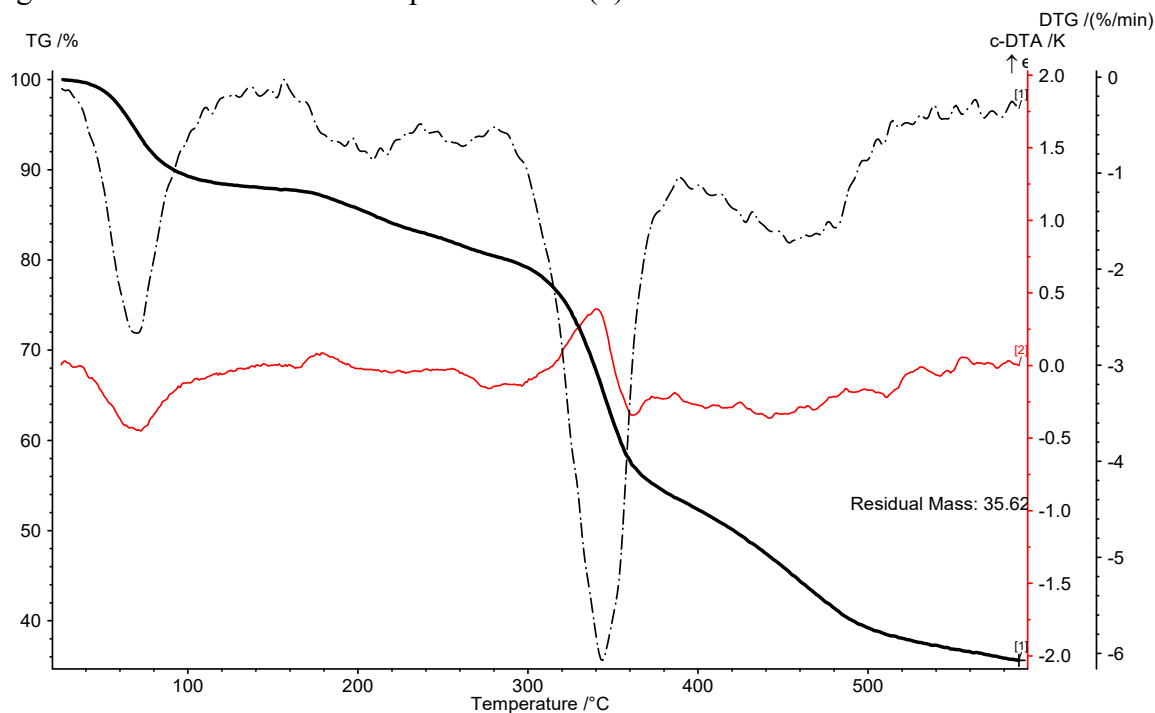

Thermal decomposition of compound **5**. First, dehydration occurs in the temperature range of 45–95°C and is accompanied by a 8 % weight loss of seven crystallization water molecules. In the temperature range of 160–240°C, the sample gradually is decomposed, being accompanied by loss of crystallization nitric acid molecules. Further weight loss occurs at 340°C, which corresponds to the decomposition temperature of CB[6].

Fig. S4g. The TGA curve of compound Eu-Dy (6)

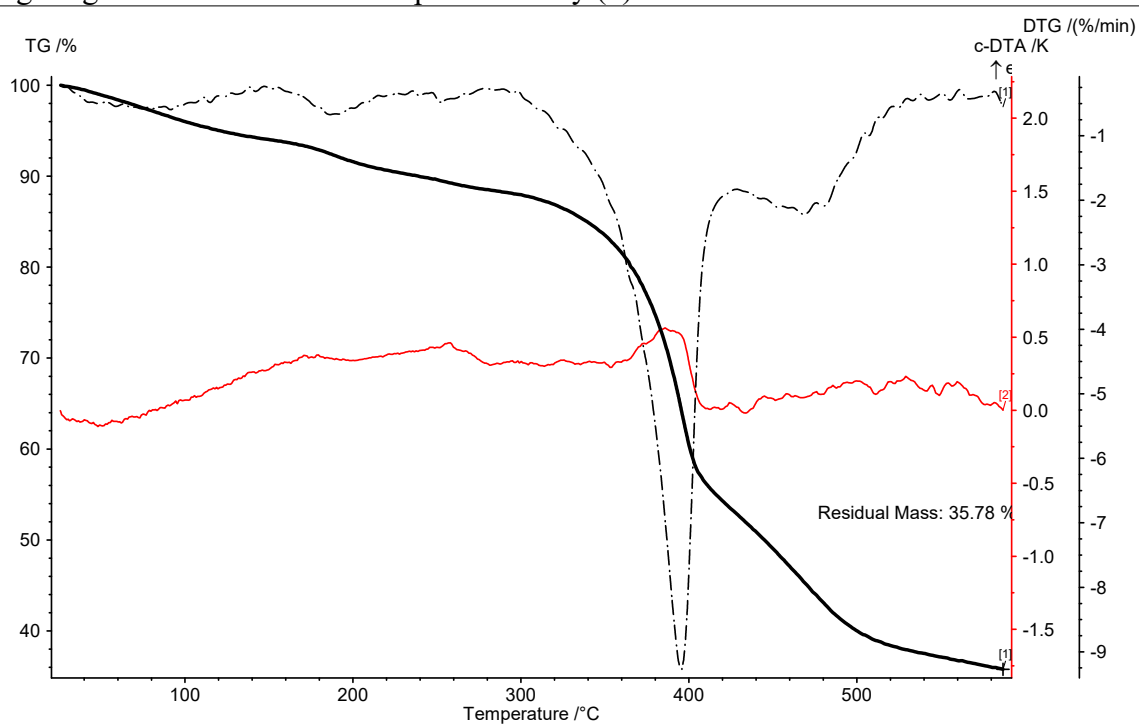

On the mass loss curve of compound **6** we observe the gradual thermal decomposition of the sample in the temperature range of 50–300°C and is accompanied by a 10 % weight loss of six crystallization water molecules and crystallization nitric acid molecules. Further weight loss occurs at 400°C, which corresponds to the decomposition temperature of CB[6].

Fig. S4h. The TGA curve of compound Eu-Ho (7)

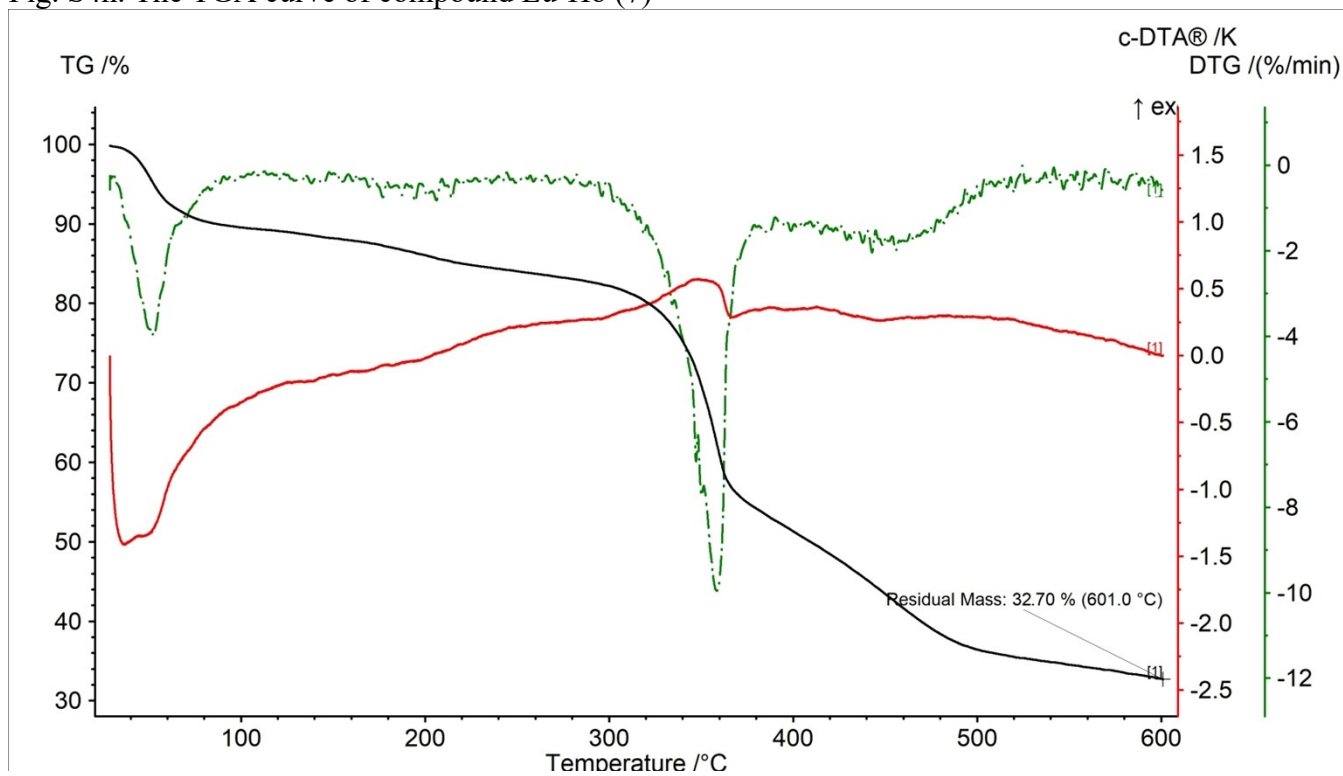

Thermal decomposition of compound 7. Desolvation occurs in the temperature range of 40–80°C, being accompanied by a 6 % weight loss of the five crystallization water. At temperature 200°C compound loose one crystallization nitric acid molecule. Further weight loss occurs at 360°C, which corresponds to the decomposition temperature of CB[6].

Fig. S4i. The TGA curve of compound Eu-Er (8)

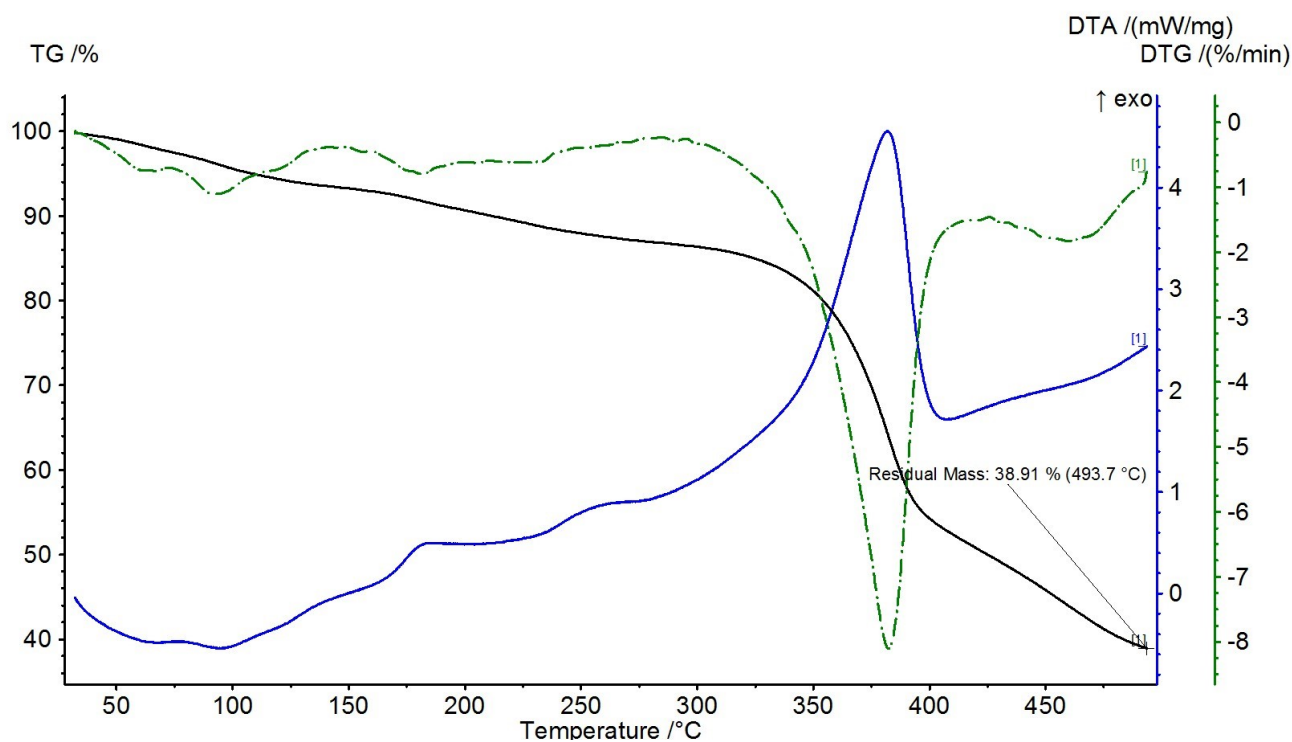

On the mass loss curve of compound 8 we observe the gradual thermal decomposition of the sample in the temperature range of 50–300°C and is accompanied by a 12 % weight loss of ten crystallization water molecules and crystallization nitric acid molecules. Further weight loss occurs at 360°C, which corresponds to the decomposition temperature of CB[6].

Fig. S4j. The TGA curve of compound Eu-Yb (9)

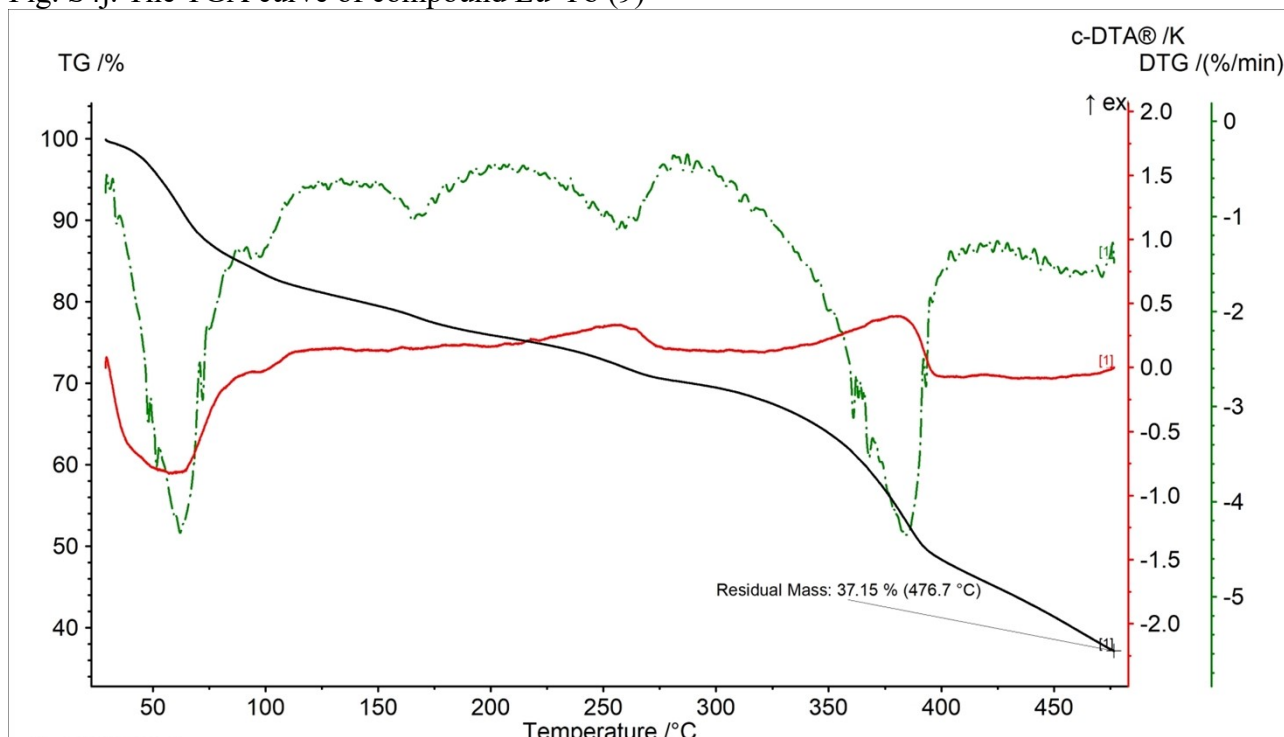

Thermal decomposition of **9** can be divided into three stages. First, desolvation occurs in the temperature range of 40–80°C and is accompanied by 15% weight loss of eleven crystallization water and nitric acid molecules. In the temperature range of 80–320°C, the sample is gradually decomposed. Further weight loss occurs at 380°C, which corresponds to the decomposition temperature of CB[6].

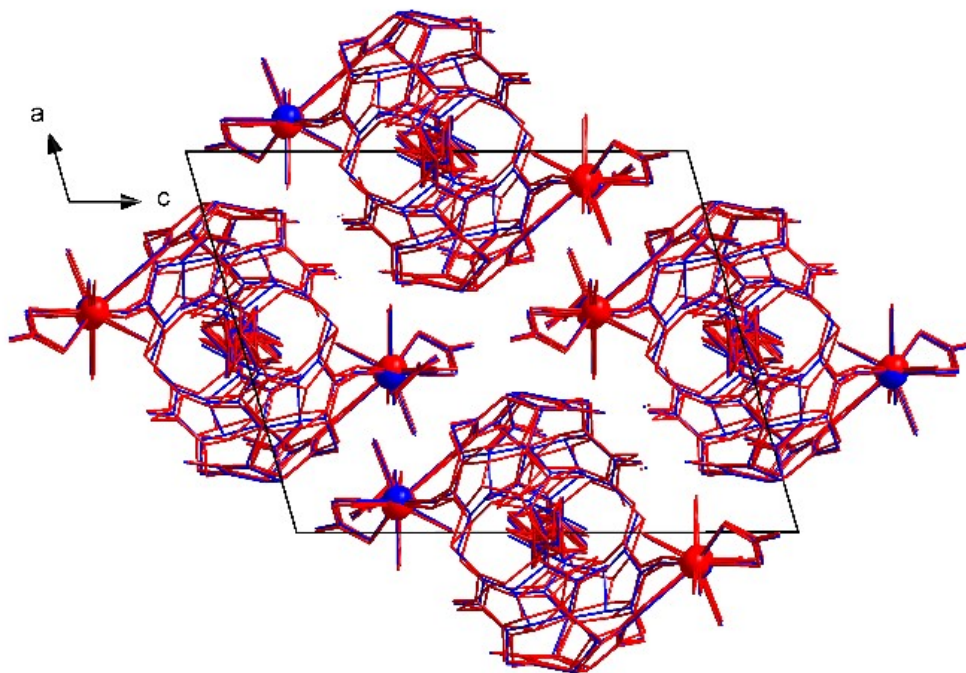

Fig. S5. An overlay of  $\alpha$ - and  $\beta$ -structures showing negligible differences between them. H atoms and hydrate molecules are not shown.



Fig. S6. Schematic energy level diagram of Tb<sup>3+</sup>, Eu<sup>3+</sup> and Dy<sup>3+</sup> ions in the complexes.

| Pr (1)                                                                            | Nd (2)                                                                            | Sm (3)                                                                            | Eu                                                                                | Gd (4)                                                                            | Tb (5)                                                                            | Dy (6)                                                                             | Ho (7)                                                                              | Er (8)                                                                              | Yb (9)                                                                              |
|-----------------------------------------------------------------------------------|-----------------------------------------------------------------------------------|-----------------------------------------------------------------------------------|-----------------------------------------------------------------------------------|-----------------------------------------------------------------------------------|-----------------------------------------------------------------------------------|------------------------------------------------------------------------------------|-------------------------------------------------------------------------------------|-------------------------------------------------------------------------------------|-------------------------------------------------------------------------------------|
| <b>Mixed lanthanide samples 1:1 Eu:Ln ratio</b>                                   |                                                                                   |                                                                                   |                                                                                   |                                                                                   |                                                                                   |                                                                                    |                                                                                     |                                                                                     |                                                                                     |
| 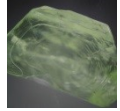 |  |  |  |  |  |  |  |  |  |
|  |  |  |  |  |  |  |  |  |  |

Fig. S7. Photographs of the 365 nm ultraviolet LED lighting the crystals of compounds **1–9** when the LED is turned off and turned on.

Table S1. Crystal data and structure refinement for the compounds

| Identification code                                          | 1                                  | 2                                                                               | 3 $\alpha$                                                                       | 3 $\beta$                                                                        | 4                                                                               | 5                                                                    | 6                                                                               | 7                                                                                                               | 8           | 9           |
|--------------------------------------------------------------|------------------------------------|---------------------------------------------------------------------------------|----------------------------------------------------------------------------------|----------------------------------------------------------------------------------|---------------------------------------------------------------------------------|----------------------------------------------------------------------|---------------------------------------------------------------------------------|-----------------------------------------------------------------------------------------------------------------|-------------|-------------|
| Empirical formula                                            |                                    | C <sub>36</sub> H <sub>68</sub> EuN <sub>31</sub> NdO <sub>4</sub> <sub>9</sub> | C <sub>36</sub> H <sub>68</sub> EuN <sub>31</sub> O <sub>49</sub> S <sub>m</sub> | C <sub>36</sub> H <sub>68</sub> EuN <sub>31</sub> O <sub>49</sub> S <sub>m</sub> | C <sub>36</sub> H <sub>68</sub> EuGdN <sub>31</sub> O <sub>4</sub> <sub>9</sub> | C <sub>36</sub> H <sub>68</sub> EuN <sub>31</sub> O <sub>49</sub> Tb | C <sub>36</sub> H <sub>68</sub> DyEuN <sub>31</sub> O <sub>4</sub> <sub>9</sub> | C <sub>36</sub> H <sub>68</sub> Eu <sub>1.4</sub> Ho <sub>0.6</sub> N <sub>3</sub> <sub>1</sub> O <sub>49</sub> |             |             |
| Formula weight                                               |                                    | 2015.41                                                                         | 2021.52                                                                          | 2021.52                                                                          | 2028.42                                                                         | 2030.09                                                              | 2033.67                                                                         | 2030.91                                                                                                         |             |             |
| Temperature/K                                                | 150(2)                             | 150(2)                                                                          | 150(2)                                                                           | 150(2)                                                                           | 150(2)                                                                          | 150(2)                                                               | 150(2)                                                                          | 150(2)                                                                                                          | 150(2)      | 150(2)      |
| Space group                                                  | <i>P</i> 2 <sub>1</sub> / <i>n</i> | <i>P</i> 2 <sub>1</sub> / <i>n</i>                                              | <i>P</i> 2 <sub>1</sub> / <i>n</i>                                               | <i>P</i> -1                                                                      | <i>P</i> -1                                                                     | <i>P</i> -1                                                          | <i>P</i> -1                                                                     | <i>P</i> -1                                                                                                     | <i>P</i> -1 | <i>R</i> -3 |
| <i>a</i> /Å                                                  | 14.3764(10)                        | 14.4113(6)                                                                      | 14.4200(5)                                                                       | 13.4418(4)                                                                       | 13.4267(3)                                                                      | 13.4041(2)                                                           | 13.4214(5)                                                                      | 13.4090(5)                                                                                                      | 13.429(3)   | 25.7946(4)  |
| <i>b</i> /Å                                                  | 13.6375(7)                         | 13.6182(7)                                                                      | 13.5890(4)                                                                       | 14.4661(4)                                                                       | 14.4721(4)                                                                      | 14.4617(2)                                                           | 14.4818(6)                                                                      | 14.4887(5)                                                                                                      | 14.477(4)   | 25.7946(4)  |
| <i>c</i> /Å                                                  | 18.0744(13)                        | 18.0470(9)                                                                      | 17.9538(6)                                                                       | 18.2775(6)                                                                       | 18.2429(4)                                                                      | 18.2115(3)                                                           | 18.2079(7)                                                                      | 18.2100(8)                                                                                                      | 18.244(4)   | 31.7638(6)  |
| $\alpha$ /°                                                  | 90                                 | 90                                                                              | 90                                                                               | 73.8147(10)                                                                      | 73.8016(10)                                                                     | 73.8223(13)                                                          | 73.8732(13)                                                                     | 73.8529(14)                                                                                                     | 73.796(18)  | 90          |
| $\beta$ /°                                                   | 105.456(3)                         | 105.5893(16)                                                                    | 105.6825(13)                                                                     | 87.3845(11)                                                                      | 87.3486(10)                                                                     | 87.3313(13)                                                          | 87.4439(13)                                                                     | 87.2751(14)                                                                                                     | 87.367(17)  | 90          |
| $\gamma$ /°                                                  | 90                                 | 90                                                                              | 90                                                                               | 87.8140(9)                                                                       | 87.8007(11)                                                                     | 87.7248(12)                                                          | 87.9242(12)                                                                     | 87.7447(12)                                                                                                     | 87.768(18)  | 120         |
| Volume/Å <sup>3</sup>                                        | 3415.5(4)                          | 3411.5(3)                                                                       | 3387.14(19)                                                                      | 3408.45(18)                                                                      | 3399.26(14)                                                                     | 3385.45(9)                                                           | 3395.3(2)                                                                       | 3393.2(2)                                                                                                       | 3401.3(15)  | 18302.9(7)  |
| <i>Z</i>                                                     |                                    | 2                                                                               | 2                                                                                | 2                                                                                | 2                                                                               | 2                                                                    | 2                                                                               | 2                                                                                                               |             |             |
| $\rho_{\text{calc}}$ /cm <sup>3</sup>                        |                                    | 1.962                                                                           | 1.982                                                                            | 1.970                                                                            | 1.982                                                                           | 1.991                                                                | 1.989                                                                           | 1.988                                                                                                           |             |             |
| $\mu$ /mm <sup>-1</sup>                                      |                                    | 1.803                                                                           | 1.916                                                                            | 1.904                                                                            | 2.021                                                                           | 2.095                                                                | 2.147                                                                           | 2.117                                                                                                           |             |             |
| F(000)                                                       |                                    | 2032.0                                                                          | 2036.0                                                                           | 2036.0                                                                           | 2040.0                                                                          | 2042.0                                                               | 2044.0                                                                          | 2043.0                                                                                                          |             |             |
| Crystal size/mm <sup>3</sup>                                 |                                    | 0.09 × 0.08 × 0.07                                                              | 0.32 × 0.21 × 0.08                                                               | 0.38 × 0.3 × 0.17                                                                | 0.13 × 0.1 × 0.06                                                               | 0.21 × 0.2 × 0.11                                                    | 0.17 × 0.14 × 0.1                                                               | 0.25 × 0.22 × 0.13                                                                                              |             |             |
| Radiation                                                    |                                    | MoK $\alpha$ ( $\lambda$ = 0.71073)                                             | MoK $\alpha$ ( $\lambda$ = 0.71073)                                              | MoK $\alpha$ ( $\lambda$ = 0.71073)                                              | MoK $\alpha$ ( $\lambda$ = 0.71073)                                             | Mo K $\alpha$ ( $\lambda$ = 0.71073)                                 | MoK $\alpha$ ( $\lambda$ = 0.71073)                                             | MoK $\alpha$ ( $\lambda$ = 0.71073)                                                                             |             |             |
| 2 $\theta$ range for data collection/°                       |                                    | 3.226 to 57.392                                                                 | 3.228 to 61.014                                                                  | 2.932 to 61.076                                                                  | 3.758 to 59.15                                                                  | 3.764 to 58.2                                                        | 2.928 to 59.238                                                                 | 2.928 to 63.06                                                                                                  |             |             |
| Index ranges                                                 |                                    | -19 ≤ <i>h</i> ≤ 17, -18 ≤ <i>k</i> ≤ 18, -24 ≤ <i>l</i> ≤ 24                   | -20 ≤ <i>h</i> ≤ 20, -19 ≤ <i>k</i> ≤ 19, -22 ≤ <i>l</i> ≤ 25                    | -19 ≤ <i>h</i> ≤ 18, -20 ≤ <i>k</i> ≤ 20, -26 ≤ <i>l</i> ≤ 26                    | -18 ≤ <i>h</i> ≤ 18, -20 ≤ <i>k</i> ≤ 20, -25 ≤ <i>l</i> ≤ 25                   | -17 ≤ <i>h</i> ≤ 13, -17 ≤ <i>k</i> ≤ 19, -24 ≤ <i>l</i> ≤ 21        | -18 ≤ <i>h</i> ≤ 18, -20 ≤ <i>k</i> ≤ 20, -25 ≤ <i>l</i> ≤ 25                   | -19 ≤ <i>h</i> ≤ 19, -20 ≤ <i>k</i> ≤ 21, 0 ≤ <i>l</i> ≤ 26                                                     |             |             |
| Reflections collected                                        |                                    | 46565                                                                           | 65540                                                                            | 35598                                                                            | 59465                                                                           | 32288                                                                | 32897                                                                           | 22195                                                                                                           |             |             |
| <i>R</i> <sub>int</sub> , <i>R</i> <sub>sigma</sub>          |                                    | 0.0311, 0.0241                                                                  | 0.0517, 0.0382                                                                   | 0.0462, 0.0713                                                                   | 0.0380, 0.0407                                                                  | 0.0228, 0.0360                                                       | 0.0542, 0.0642                                                                  | 0.0814, 0.0800                                                                                                  |             |             |
| Data/restraints/parameters                                   |                                    | 8741/147/595                                                                    | 10354/117/595                                                                    | 35598/294/1210                                                                   | 18997/276/1209                                                                  | 15136/329/1209                                                       | 32897/283/1212                                                                  | 22195/289/1210                                                                                                  |             |             |
| Goodness-of-fit on F <sup>2</sup>                            |                                    | 1.118                                                                           | 1.030                                                                            | 1.063                                                                            | 1.203                                                                           | 1.030                                                                | 1.031                                                                           | 1.163                                                                                                           |             |             |
| Final <i>R</i> indexes [ <i>I</i> ≥ 2 $\sigma$ ( <i>I</i> )] |                                    | <i>R</i> <sub>1</sub> = 0.0408, <i>wR</i> <sub>2</sub> = 0.1128                 | <i>R</i> <sub>1</sub> = 0.0295, <i>wR</i> <sub>2</sub> = 0.0675                  | <i>R</i> <sub>1</sub> = 0.0470, <i>wR</i> <sub>2</sub> = 0.1221                  | <i>R</i> <sub>1</sub> = 0.0453, <i>wR</i> <sub>2</sub> = 0.1010                 | <i>R</i> <sub>1</sub> = 0.0263, <i>wR</i> <sub>2</sub> = 0.0567      | <i>R</i> <sub>1</sub> = 0.0613, <i>wR</i> <sub>2</sub> = 0.1490                 | <i>R</i> <sub>1</sub> = 0.0569, <i>wR</i> <sub>2</sub> = 0.1165                                                 |             |             |
| Final <i>R</i> indexes [all data]                            |                                    | <i>R</i> <sub>1</sub> = 0.0455, <i>wR</i> <sub>2</sub> = 0.1173                 | <i>R</i> <sub>1</sub> = 0.0425, <i>wR</i> <sub>2</sub> = 0.0714                  | <i>R</i> <sub>1</sub> = 0.0590, <i>wR</i> <sub>2</sub> = 0.1281                  | <i>R</i> <sub>1</sub> = 0.0516, <i>wR</i> <sub>2</sub> = 0.1035                 | <i>R</i> <sub>1</sub> = 0.0335, <i>wR</i> <sub>2</sub> = 0.0603      | <i>R</i> <sub>1</sub> = 0.0735, <i>wR</i> <sub>2</sub> = 0.1558                 | <i>R</i> <sub>1</sub> = 0.1019, <i>wR</i> <sub>2</sub> = 0.1369                                                 |             |             |
| Largest diff. peak/hole / e Å <sup>-3</sup>                  |                                    | 2.78/-1.75                                                                      | 0.71/-0.93                                                                       | 2.49/-1.74                                                                       | 2.05/-1.55                                                                      | 1.16/-0.72                                                           | 6.38/-2.40                                                                      | 1.74/-1.57                                                                                                      |             |             |

Table S2. Ln–O bond distances in the  $\beta$  structures with color coding for each distance from green (large) through yellow (medium) to red (small).

| Atoms |      | Eu-Sm ( <b>3<math>\beta</math></b> ) | Eu         | Eu-Gd ( <b>4</b> ) | Eu-Tb ( <b>5</b> ) | Eu-Dy ( <b>6</b> ) | Eu-Ho ( <b>7</b> ) |
|-------|------|--------------------------------------|------------|--------------------|--------------------|--------------------|--------------------|
| Ln1   | O11M | 2.503(3)                             | 2.4950(18) | 2.491(3)           | 2.485(2)           | 2.482(5)           | 2.479(5)           |
| Ln1   | O12M | 2.418(3)                             | 2.4084(18) | 2.412(3)           | 2.3970(18)         | 2.401(5)           | 2.389(5)           |
| Ln1   | O13M | 2.443(3)                             | 2.4310(18) | 2.427(3)           | 2.4153(18)         | 2.419(5)           | 2.405(5)           |
| Ln1   | O14M | 2.445(3)                             | 2.4337(18) | 2.430(3)           | 2.4242(18)         | 2.428(5)           | 2.413(5)           |
| Ln1   | O15M | 2.409(3)                             | 2.3899(19) | 2.390(3)           | 2.3774(19)         | 2.379(5)           | 2.376(5)           |
| Ln1   | O11N | 2.489(3)                             | 2.4795(17) | 2.481(3)           | 2.467(2)           | 2.471(5)           | 2.467(5)           |
| Ln1   | O12N | 2.550(3)                             | 2.5434(18) | 2.541(3)           | 2.533(2)           | 2.527(5)           | 2.526(5)           |
| Ln1   | O11  | 2.381(3)                             | 2.3764(16) | 2.377(3)           | 2.3665(19)         | 2.376(5)           | 2.363(4)           |
| Ln1   | O21  | 2.480(3)                             | 2.4753(17) | 2.474(3)           | 2.4700(17)         | 2.479(5)           | 2.469(4)           |
| Ln2   | O21M | 2.436(3)                             | 2.4309(18) | 2.430(3)           | 2.414(2)           | 2.416(5)           | 2.408(5)           |
| Ln2   | O22M | 2.428(3)                             | 2.4111(18) | 2.412(3)           | 2.4016(18)         | 2.404(5)           | 2.392(5)           |
| Ln2   | O23M | 2.517(3)                             | 2.5023(17) | 2.500(3)           | 2.4891(19)         | 2.488(5)           | 2.479(5)           |
| Ln2   | O24M | 2.407(3)                             | 2.3946(18) | 2.391(3)           | 2.380(2)           | 2.376(5)           | 2.368(5)           |
| Ln2   | O25M | 2.429(3)                             | 2.4188(18) | 2.414(3)           | 2.4045(19)         | 2.410(5)           | 2.398(5)           |
| Ln2   | O21N | 2.521(3)                             | 2.5152(18) | 2.516(3)           | 2.5067(18)         | 2.507(5)           | 2.495(5)           |
| Ln2   | O22N | 2.505(3)                             | 2.4945(17) | 2.494(3)           | 2.4859(17)         | 2.483(5)           | 2.475(5)           |
| Ln2   | O41  | 2.473(3)                             | 2.4664(17) | 2.461(3)           | 2.4578(17)         | 2.462(5)           | 2.458(5)           |
| Ln2   | O51  | 2.363(3)                             | 2.3572(17) | 2.350(3)           | 2.3461(17)         | 2.342(5)           | 2.334(5)           |

Table S3. Quantum yield under different excitation.

| Compound | Excitation $\lambda_{\text{ex}}$ , nm |     |     |     |     |
|----------|---------------------------------------|-----|-----|-----|-----|
|          | 305                                   | 325 | 365 | 370 | 395 |
| <b>5</b> | 1                                     | 1   | 2   | 6   | 12  |
| <b>6</b> | -                                     | <1  | -   | -   | 1   |
| <b>1</b> | -                                     | -   | <1  | -   | <1  |
| <b>2</b> | -                                     | -   | <1  | -   | <1  |
| <b>3</b> | -                                     | -   | <1  | <1  | 1   |
| <b>4</b> | -                                     | <1  | -   | <1  | 2   |
| <b>7</b> | -                                     | <1  | 1   | -   | 10  |
| <b>8</b> | -                                     | 1   | -   | -   | 2   |
| <b>9</b> | -                                     | 1   | 1   | -   | <1  |
